# Supplementary material for: Robust sampling and preservation of DNA for microbial community profiling in field experiments
Source: PubMed Central journal article supplement (PMC6429817; doi:10.1186/s13104-019-4187-2), 2019-03-22

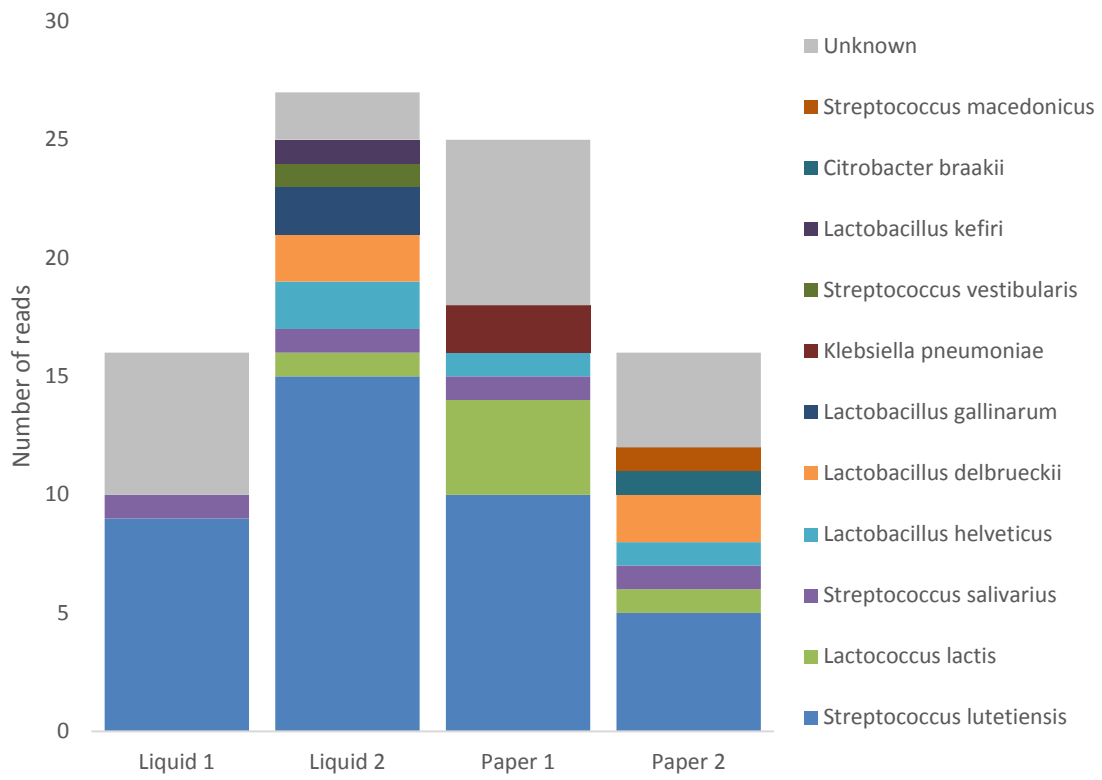

Supplement: 13104_2019_4187_MOESM2_ESM.pdf [file 13104_2019_4187_MOESM2_ESM.pdf]
